# Supplementary material
Source: PubMed Central journal article supplement (PMC3985445)
Supplement: ci400568c_si_001.pdf [file ci400568c_si_001.pdf]

# Supporting Information

## **Quality matters: Extension of clusters of residues with good hydrophobic contacts stabilize (hyper)thermophilic proteins**

Prakash Chandra Rathi<sup>1</sup>, Hans Wolfgang Höffken<sup>2</sup>, Holger Gohlke<sup>1\*</sup>

<sup>1</sup>Institute for Pharmaceutical and Medicinal Chemistry, Department of Mathematics and Natural Sciences,

Heinrich Heine University, Düsseldorf, Germany

<sup>2</sup>BASF SE, GVC/C - A030, 67056 Ludwigshafen, Germany

\*Universitätsstr. 1, 40225 Düsseldorf, Germany, Phone: (+49) 211-81-13662, Fax: (+49) 211-81-13847, Email: gohlke@uni-duesseldorf.de

## Supplemental experimental procedures

### Preparation of protein structures

All proteins in the dataset were downloaded from the Protein Data Bank (PDB)<sup>1</sup>, and if required, the desired chain was extracted from the PDB file. All water molecules, ligands, and ions were removed from the structures. The command line version of the protein preparation wizard<sup>2</sup> of the Schrödinger software (Schrödinger, LLC, New York, NY, 2011) was used to prepare the protomer structures in order to I) add hydrogen atoms, II) add missing side chain atoms, and III) build disulphide bridges. Protein bio-assemblies were downloaded from the PDB and prepared in an identical manner as the protomers.

### Calculation of residue-wise energy components

Protomers (and bio-assemblies) were minimized using the Prime module<sup>3,4</sup> version 3.0 of the Schrödinger software (Schrödinger, LLC, New York, NY, 2011) using default settings. Then, residue-wise electrostatic, van der Waals, and hydrophobic interaction energy components were calculated for the minimized structures by Prime. The hydrogen bond (including charge assisted hydrogen bonds) energy was calculated using a geometry-based energy function developed for protein design<sup>5</sup> as implemented in the FIRST software<sup>6</sup>. The energies of all hydrogen bonds for a residue were summed for calculating residue-wise hydrogen bond energies.

### Clustering of residues by residue-wise energy components

Residues in a protein structure are clustered together if they are neighbors and if their values of the residue-wise energy components are below a cutoff  $E_C$ . Residues are considered neighbors if the distance between the closest pair of atoms is  $\leq 4$  Å.  $E_C$  is increased in a stepwise manner, and the clustering is repeated for each new  $E_C$ . As a result, a hierarchical clustering is obtained where clusters become larger as  $E_C$  increases. For each  $E_C$  value, the fraction of residues that is part of the largest cluster with respect to all protein residues ( $F_{LC}$ ) is calculated.  $E_C$  was increased from an initial value of  $-30$  kcal mol<sup>-1</sup> to a final value of  $0$  kcal mol<sup>-1</sup> with a step size of  $0.5$  kcal mol<sup>-1</sup>.

### Clustering of hydrophobic residues by inter-residue distances

Residues in a protein structure are clustered together if they belong to the type “hydrophobic” (Ala, Cys, Ile, Leu, Met, Phe, Trp, and Val) and are within a distance cutoff  $D_C$ . The distance between the closest atoms of two residues was considered the distance between these residues.  $D_C$  is increased in a stepwise-manner, and the clustering is repeated for each new  $D_C$ . As a result, a hierarchical clustering is obtained where clusters become larger as  $D_C$  increases. For each  $D_C$  value, the fraction of residues that is part of the largest cluster with respect to all protein residues ( $F_{LC}$ ) is calculated.  $D_C$  was increased from an initial value of  $1$  Å to a final value of  $5$  Å with a step size of  $0.05$  Å.

## Supplemental tables

Table S1. PDB ID and chain identifier of pairs of mesophilic/thermophilic proteins.

| Thermoph. | Mesoph. | Thermoph. | Mesoph. | Thermoph. | Mesoph. | Thermoph. | Mesoph. |
|-----------|---------|-----------|---------|-----------|---------|-----------|---------|
| 1nw2_A    | 1fb6_A  | 1hbn_B    | 1e6y_B  | 1odk_B    | 1vhw_A  | 2cuy_A    | 1mla_A  |
| 1urd_A    | 1anf_A  | 2f2b_A    | 1z98_A  | 1uay_A    | 1e6w_D  | 2c wd_A   | 1xww_A  |
| 2hm7_A    | 1lzl_A  | 2q5b_A    | 2cj3_A  | 1ub3_A    | 1p1x_A  | 2d1y_C    | 2zat_A  |
| 2sqc_A    | 1w6j_A  | 2v08_A    | 1ls9_A  | 1ufy_A    | 1dbf_A  | 2d29_A    | 2vig_A  |
| 1c9o_A    | 2es2_A  | 1ugp_B    | 2cz1_B  | 1ug6_A    | 1e4i_A  | 2d4e_A    | 2ve5_D  |
| 2b5a_A    | 1y7y_A  | 1b06_A    | 1bsm_A  | 1ui0_A    | 2c2q_A  | 2d4p_A    | 1s3z_A  |
| 1b4b_A    | 2p5m_A  | 1mp9_A    | 1qna_A  | 1uir_B    | 2pt9_A  | 2d5b_A    | 1pfv_A  |
| 1g2w_A    | 1iye_A  | 1thm_A    | 2tec_E  | 1uj5_A    | 2f8m_A  | 2d5c_A    | 1nyt_A  |
| 1gtf_A    | 1wap_A  | 3tec_I    | 1cse_I  | 1ulr_A    | 1urr_A  | 2d5w_A    | 1zu0_A  |
| 1hvx_A    | 3bh4_A  | 1h1n_A    | 1a3h_A  | 1umd_A    | 2ozl_A  | 2d8d_A    | 1ecm_A  |
| 1lqy_A    | 2okl_A  | 1i1x_A    | 1ta3_B  | 1umd_B    | 2ozl_B  | 2dt9_A    | 2dtj_A  |
| 1r2z_A    | 1xc8_A  | 1mtp_A    | 1sek_A  | 1v37_A    | 2a6p_A  | 2e7u_A    | 2hp1_A  |
| 1tqh_A    | 3dlt_A  | 2fla_A    | 1b0y_A  | 1v6s_A    | 1hdi_A  | 2ebj_A    | 1aug_A  |
| 1whi_A    | 1vqo_K  | 1bqc_A    | 1a3h_A  | 1v8f_A    | 1n2e_A  | 2eg4_A    | 1h4k_X  |
| 1y51_A    | 1ptf_A  | 1tf4_A    | 1ga2_B  | 1v8m_A    | 3ees_A  | 2eiy_B    | 1iye_A  |
| 1zdr_A    | 3dau_A  | 1tml_A    | 1dys_A  | 1v98_A    | 1fb6_A  | 2ekp_A    | 2zat_A  |
| 1zin_A    | 2eu8_A  | 1tib_A    | 3tgl_A  | 1vbi_A    | 1wtj_A  | 2fk5_A    | 1e4c_P  |
| 2bkm_A    | 2qrw_B  | 1yna_A    | 2dfb_A  | 1vc3_B    | 1uhe_A  | 2is8_A    | 1ihc_A  |
| 2exi_A    | 1y7b_A  | 2dte_A    | 1uzn_A  | 1vcd_A    | 1ktg_A  | 2j07_A    | 1owl_A  |
| 2tlx_A    | 1bqb_A  | 1my6_A    | 1xre_A  | 1vel_A    | 2pqm_A  | 2p5y_A    | 1ek6_A  |
| 2bd0_A    | 1oaa_A  | 2c41_A    | 2c2u_A  | 1vef_A    | 2oat_A  | 2prd_A    | 2bqx_A  |
| 1aoh_A    | 1g1k_A  | 1esw_A    | 1x1n_A  | 1vfj_A    | 2pii_A  | 2pwy_A    | 1i9g_A  |
| 1cem_A    | 1v5d_A  | 2ng1_A    | 2qy9_A  | 1wlu_A    | 1q4u_A  | 2qhs_A    | 1w66_A  |
| 1h6y_A    | 1gny_A  | 1b5p_A    | 1asd_A  | 1wmw_A    | 2f94_F  | 2yqu_A    | 3lad_A  |
| 1nbc_A    | 1g43_A  | 1bxb_A    | 1oad_A  | 1wo8_A    | 1b93_A  | 2yvp_A    | 1g0s_B  |
| 1xyz_A    | 1e0w_A  | 1gd7_A    | 2q2i_A  | 1wur_A    | 1a8r_A  | 2z1a_A    | 1hpu_A  |
| 2b59_A    | 1qzn_A  | 1iv3_A    | 1h47_A  | 1wz8_A    | 2zqq_A  | 2z1y_B    | 1j32_A  |
| 2olj_A    | 1b0u_A  | 1iz9_A    | 2hjr_A  | 1x1o_A    | 2jbm_C  | 2zc8_A    | 1sjd_A  |
| 2q8x_A    | 1uqz_A  | 1j33_A    | 1l5o_A  | 1yya_A    | 2dp3_A  | 2zdb_A    | 3d0s_A  |
| 3d60_A    | 1gyh_A  | 1j3n_A    | 1oxh_A  | 1z54_A    | 1s5u_A  | 2zdh_A    | 1iow_A  |
| 1eje_A    | 3bnk_A  | 1j3w_A    | 1vet_B  | 2b3f_A    | 1anf_A  | 3cm0_A    | 3adk_A  |
| 1ep0_A    | 2ixc_A  | 1n97_A    | 1bu7_A  | 2bhq_A    | 2o2r_A  | 3hrx_A    | 1dci_A  |
| 1g5c_A    | 1ylk_A  | 1nza_A    | 2zfh_A  | 2cuk_A    | 2gcg_A  | 3mds_A    | 1xre_A  |

**Table S2.** PDB ID and chain identifier of pairs of mesophilic/hyperthermophilic proteins.

| Hyper-thermoph. | Mesoph. | Hyper-thermoph. | Mesoph. | Hyper-thermoph. | Mesoph. | Hyper-thermoph. | Mesoph. |
|-----------------|---------|-----------------|---------|-----------------|---------|-----------------|---------|
| 1h2b_A          | 1n8k_A  | 3c7b_B          | 2v4j_B  | 1zjj_A          | 2c4n_A  | 2z30_A          | 1st3_A  |
| 1n7k_A          | 1p1x_A  | 3cnu_A          | 2qzt_B  | 2cun_A          | 1hdi_A  | 1eu8_A          | 1anf_A  |
| 1tyo_A          | 1pb1_A  | 3do8_B          | 1coz_A  | 2cwp_A          | 3ers_X  | 1wst_A          | 2r2n_A  |
| 2fc3_A          | 1zwz_A  | 1g6h_A          | 2ff7_A  | 2d69_A          | 1rbl_A  | 1uxt_A          | 1euh_A  |
| 2yvu_A          | 2pez_A  | 1l2t_A          | 2ff7_A  | 2dbb_A          | 2qz8_A  | 2r91_A          | 2v8z_A  |
| 1c3p_A          | 1t64_A  | 1pkh_A          | 2qxx_A  | 2dr1_A          | 1w23_A  | 1d1g_A          | 3fq0_A  |
| 1hqk_A          | 2c92_A  | 1snn_A          | 1k4i_A  | 2dx_e_A         | 1npk_A  | 1inl_C          | 2o07_B  |
| 1mzh_A          | 1p1x_A  | 1twi_A          | 1ko0_A  | 2e5f_A          | 1moq_A  | 1kq3_A          | 1ta9_B  |
| 1tz7_A          | 1x1n_A  | 2eb0_B          | 1k20_A  | 2e5w_A          | 2pt9_A  | 1nf2_A          | 1rkq_A  |
| 1ulz_A          | 2w70_A  | 2j9d_C          | 2pii_A  | 2ekn_A          | 2eey_A  | 1o0x_A          | 1y1n_A  |
| 1wwr_D          | 2b3j_A  | 2pa6_A          | 2akz_A  | 2hun_B          | 1r66_A  | 1o0y_A          | 1p1x_A  |
| 2e55_A          | 1bd3_A  | 2yww_A          | 2fzc_B  | 3cg3_A          | 3cfx_A  | 1o4s_A          | 1asd_A  |
| 2e8e_A          | 1n2f_A  | 2z02_A          | 2gqs_A  | 1ais_A          | 1qna_A  | 1oh4_A          | 1pmj_X  |
| 2ebd_A          | 1zow_A  | 2z8u_B          | 1qna_A  | 1mxd_A          | 3bh4_A  | 1p1m_A          | 2i9u_A  |
| 2egj_A          | 1s5u_A  | 1ftr_A          | 1m5s_A  | 1b7g_O          | 1u8f_R  | 1tmy_A          | 3chy_A  |
| 2ehh_A          | 3di1_A  | 1vcv_A          | 1p1x_A  | 1io7_A          | 3bdz_A  | 1tzx_A          | 1eyv_A  |
| 2ehs_A          | 1l0i_A  | 1ml4_A          | 1ekx_A  | 1je1_C          | 1vhw_A  | 1vbu_A          | 1ta3_B  |
| 2eja_A          | 3gw0_A  | 1aj8_A          | 1csh_A  | 1nto_A          | 1n8k_A  | 1vc1_A          | 1h4y_A  |
| 2hk9_A          | 1nyt_A  | 1gtm_A          | 1bgv_A  | 1uwr_A          | 2e3z_A  | 1vj0_A          | 1n8k_A  |
| 2omd_A          | 2q5w_E  | 1jg1_A          | 1i1n_A  | 1vph_A          | 1vmh_A  | 1vl8_A          | 1gee_A  |
| 2pbq_A          | 2g4r_A  | 1nnh_A          | 12as_A  | 1xtt_A          | 1bd3_A  | 1vlc_A          | 1cnz_A  |
| 2pbr_A          | 1e9e_A  | 1pvv_A          | 1oth_A  | 2f5g_A          | 2vjv_A  | 1vlg_C          | 1eum_A  |
| 2pnf_A          | 1q7b_A  | 1vkc_A          | 2fe7_B  | 2i6j_A          | 1fpz_A  | 1vlh_B          | 1qjc_A  |
| 2r75_1          | 2vxy_A  | 1ybz_A          | 1ecm_A  | 2var_C          | 1rkd_A  | 1vlj_A          | 1ta9_B  |
| 2yvl_A          | 1i9g_A  | 2dsk_A          | 2uy3_A  | 3f8p_D          | 1trb_A  | 1vm7_A          | 2fv7_A  |
| 2yvw_A          | 1uae_A  | 1gde_A          | 2r5e_A  | 1vgm_A          | 2h12_B  | 1vma_A          | 2qy9_A  |
| 2yw2_A          | 3g8c_A  | 1iu8_A          | 1aug_A  | 1wlt_A          | 2ixc_A  | 1vmj_A          | 1vmh_A  |
| 2z1m_A          | 1rpn_A  | 1lk5_A          | 1m0s_A  | 1wrj_A          | 1sfe_A  | 1vp2_A          | 1ex2_A  |
| 1coj_A          | 1bsm_A  | 1ub9_A          | 1r1u_A  | 1x0u_A          | 1on3_A  | 1vq0_A          | 1vzy_A  |
| 1jji_A          | 1lzl_A  | 1udd_A          | 2qcx_B  | 1x25_A          | 1qd9_A  | 1w2t_A          | 1y4w_A  |
| 1lbv_A          | 2qfl_A  | 1uku_A          | 2zfh_A  | 2e0q_A          | 1fb6_A  | 1w3j_A          | 1e4i_A  |
| 1p1l_A          | 2nuh_A  | 1v96_B          | 2h1c_A  | 2e7x_A          | 2qz8_A  | 1wa3_A          | 1wbh_A  |
| 1txg_A          | 1n1e_A  | 1w2i_A          | 1urr_A  | 2ehg_A          | 1jl1_A  | 1wos_A          | 1wsr_A  |
| 1vi6_A          | 3bch_A  | 1wqa_A          | 1k2y_X  | 2ekl_A          | 1dxy_A  | 2e54_A          | 2oat_A  |
| 2a5w_A          | 2v4j_C  | 1wr8_A          | 1s2o_A  | 2ggs_A          | 1n2s_A  | 2fnc_A          | 1anf_A  |
| 2b2h_A          | 3bhs_A  | 1wwk_A          | 1dxy_A  | 2bo1_A          | 1vqo_F  | 2h3h_B          | 2dri_A  |
| 2cyb_A          | 2yxn_A  | 1wy1_A          | 2zhz_A  | 1mgt_A          | 1sfe_A  | 2p3n_A          | 2qfl_A  |
| 3c7b_A          | 2v4j_A  |                 |         |                 |         |                 |         |

**Table S3.** *p*-values regarding equality in discrimination accuracies between mesophilic and (hyper)thermophilic protomers for clustering based on different residue-wise energy components *versus* a random discrimination.<sup>[a]</sup>

|                                | Hydrogen bond    | van der Waals    | Hydrophobic interaction | Random           |
|--------------------------------|------------------|------------------|-------------------------|------------------|
| <b>Hydrogen bond</b>           | - <sup>[b]</sup> | 0.3245           | <0.0001                 | 0.2196           |
| <b>van der Waals</b>           | 0.0005           | - <sup>[b]</sup> | <0.0001                 | 0.8056           |
| <b>Hydrophobic interaction</b> | 0.0042           | 0.5829           | - <sup>[b]</sup>        | <0.0001          |
| <b>Random</b>                  | 0.0610           | <0.0001          | <0.0001                 | - <sup>[b]</sup> |

<sup>[a]</sup> The discrimination analysis is based on clustering by residue-wise energy components. The *p*-values were computed by a bootstrap hypothesis of equality generating 10000 bootstrap samples. Values in shaded shells correspond to mesophilic/hyperthermophilic protomers, other values correspond to mesophilic/thermophilic protomers.

<sup>[b]</sup> Not determined.

**Table S4.** *p*-values regarding equality in discrimination accuracies between mesophilic and (hyper)thermophilic protein bio-assemblies for clustering based on different residue-wise energy components *versus* a random discrimination.<sup>[a]</sup>

|                                | Hydrogen bond    | van der Waals    | Hydrophobic interaction | Random           |
|--------------------------------|------------------|------------------|-------------------------|------------------|
| <b>Hydrogen bond</b>           | - <sup>[b]</sup> | 1.0000           | <0.0001                 | 0.6020           |
| <b>van der Waals</b>           | 0.0572           | - <sup>[b]</sup> | <0.0001                 | 0.6068           |
| <b>Hydrophobic interaction</b> | 0.0534           | 1.0000           | - <sup>[b]</sup>        | <0.0001          |
| <b>Random</b>                  | 0.1141           | 0.0004           | 0.0007                  | - <sup>[b]</sup> |

<sup>[a]</sup> The discrimination analysis is based on clustering by residue-wise energy components. The *p*-values were computed by a bootstrap hypothesis of equality generating 10000 bootstrap samples. Values in shaded shells correspond to mesophilic/hyperthermophilic protein bio-assemblies, other values correspond to mesophilic/thermophilic protein bio-assemblies.

<sup>[b]</sup> Not determined.

**Table S5.** Discrimination between mesophilic and (hyper)thermophilic protomers when clustering residues of type “hydrophobic” by inter-residue spatial distance.

| Pairs                        | Discrimination accuracy <sup>[b]</sup> | <i>p</i> -value <sup>[a]</sup> |
|------------------------------|----------------------------------------|--------------------------------|
| Mesophilic/thermophilic      | 53.03                                  | 0.6175                         |
| Mesophilic/hyperthermophilic | 61.74                                  | 0.0369                         |

<sup>[a]</sup> The *p*-values were computed by a bootstrap hypothesis of equality between the given discrimination accuracy and a random discrimination (50% correct discrimination) generating 10000 bootstrap samples.

<sup>[b]</sup> In %.

**Table S6.** Thermostability of *E. coli* DHFR mutants.

| Mutant | $\Delta\Delta G$ (H <sub>2</sub> O) [kcal mol <sup>-1</sup> ] <sup>[a]</sup> | Mutant | $\Delta\Delta G$ (H <sub>2</sub> O) [kcal mol <sup>-1</sup> ] <sup>[a]</sup> |
|--------|------------------------------------------------------------------------------|--------|------------------------------------------------------------------------------|
| G15A   | <b>0.70</b>                                                                  | W74F   | -1.20                                                                        |
| P21L   | -0.10                                                                        | V88I   | <b>0.75</b>                                                                  |
| W22L   | <b>0.10</b>                                                                  | V88A   | <b>0.39</b>                                                                  |
| L24V   | -1.90                                                                        | G95A   | <b>1.30</b>                                                                  |
| D27N   | <b>1.40</b>                                                                  | T113V  | -1.20                                                                        |
| L28R   | <b>1.72</b>                                                                  | D122A  | -1.60                                                                        |
| W30M   | -2.03                                                                        | E139Q  | -0.42                                                                        |
| W30Y   | -2.16                                                                        | E139K  | -1.00                                                                        |
| W30A   | -2.33                                                                        | S148K  | -0.26                                                                        |
| W30R   | -2.49                                                                        | S148P  | -0.26                                                                        |
| W30N   | -2.52                                                                        | S148V  | -0.33                                                                        |
| W30S   | -2.74                                                                        | S148A  | -0.47                                                                        |
| W30H   | -2.78                                                                        | S148T  | -0.51                                                                        |
| W30E   | -2.89                                                                        | S148E  | -0.52                                                                        |
| F31V   | -1.50                                                                        | S148R  | -0.75                                                                        |
| F31A   | -1.90                                                                        | S148N  | -0.89                                                                        |
| T35A   | -1.10                                                                        | I155V  | -0.58                                                                        |
| P39C   | -3.00 <sup>[b]</sup>                                                         | I155L  | -2.27                                                                        |
| V40I   | -0.85                                                                        | I155L  | -2.80                                                                        |
| V40L   | -1.35                                                                        | I155E  | -3.26                                                                        |
| V40A   | -1.55                                                                        | I155R  | -3.28                                                                        |
| V40R   | -1.72                                                                        | I155T  | -3.30                                                                        |
| V40M   | -2.00                                                                        | I155K  | -3.35                                                                        |
| V40F   | -2.15                                                                        | I155Y  | -3.64                                                                        |
| V40N   | -2.17                                                                        | I155A  | -3.82                                                                        |
| V40S   | -2.52                                                                        | I155Q  | -3.86                                                                        |
| V40H   | -3.27                                                                        | I155S  | -3.93                                                                        |
| G43A   | -0.40                                                                        | I155A  | -4.00                                                                        |
| L54V   | <b>0.40</b>                                                                  | I155D  | -4.10                                                                        |
| P66A   | <b>1.30</b>                                                                  | I155W  | -4.31                                                                        |

<sup>[a]</sup>  $\Delta G$  (mutant) –  $\Delta G$  (wild-type) where  $\Delta G$  is the free energy of unfolding in water, determined by denaturant (urea; guanidine hydrochloride; glutathione disulfide/glutathione; guanidinium thiocyanate) denaturation of proteins and extrapolation of the data to zero concentration of the denaturant. A positive value (marked in bold) indicates that the mutant is more thermostable than the wild-type.

<sup>[b]</sup>  $T_m$  (mutant) –  $T_m$  (wild-type) in K where  $T_m$  is the melting temperature identified as a mid-point temperature at which half of the protein is unfolded in a thermal unfolding method.

**Table S7.** Additional validation of weak spot prediction.

| Protein                                | Mutations <sup>[a]</sup>                                                                                                                                                                                                                                                                                                                    | % correct prediction                                                                                  | Comment                                                                                                                                                                                                       | Ref. |
|----------------------------------------|---------------------------------------------------------------------------------------------------------------------------------------------------------------------------------------------------------------------------------------------------------------------------------------------------------------------------------------------|-------------------------------------------------------------------------------------------------------|---------------------------------------------------------------------------------------------------------------------------------------------------------------------------------------------------------------|------|
| <i>B. subtilis</i> adenylate kinase    | <b>Stabilizing mutations</b><br><i>L3I</i> , G17A, D23K, <b>K69R</b> , <b>G73S</b> , <b>D75S</b> , I99S, <i>Y103M</i> , K105R, E114Q, <b>D118E</b> , V119E, <i>M121I</i> , E122A, S169T, Q180A, <b>D184A</b> , S187D, <b>E188S</b> , <b>G190E</b> , <i>Y191V</i> , <i>A193V</i> , <i>Y205F</i> , <b>D210V</b> , <i>L211I</i> , <b>K217Q</b> | 34.61%<br>(47.36% excluding mutations involving the exchange of one hydrophobic residue with another) | Mutations in two multiple-mutants that led to an increase of 11.6°C and 12.5°C in the melting temperature $T_m$ compared to the wild type                                                                     | 7    |
| <i>E. coli</i> maltose binding protein | <b>Destabilizing mutations</b><br><b>V8G</b> , <b>W10A</b> , G19C, <b>I59A</b> , <b>I108A</b> , <b>L115A</b> , <b>L147A</b> , <b>P159A</b> , <b>I161A</b> , <b>L192A</b> , <b>L195A</b> , <b>I226A</b> , <b>A276G</b> , <b>Y283D</b> , <b>V347A</b> , <b>L361A</b>                                                                          | 93.75%                                                                                                | Single point mutations that led to a decrease in the $T_m$ in a range of 0.1 to 7.5°C or in the free energy of unfolding $\Delta G$ in a range of 0.3 to 5.5 kcal mol <sup>-1</sup> compared to the wild type | 8-11 |

<sup>[a]</sup> A correctly predicted mutation site is marked in bold. A mutation in italic involves the exchange of one hydrophobic residue with another.

## Supplemental figures

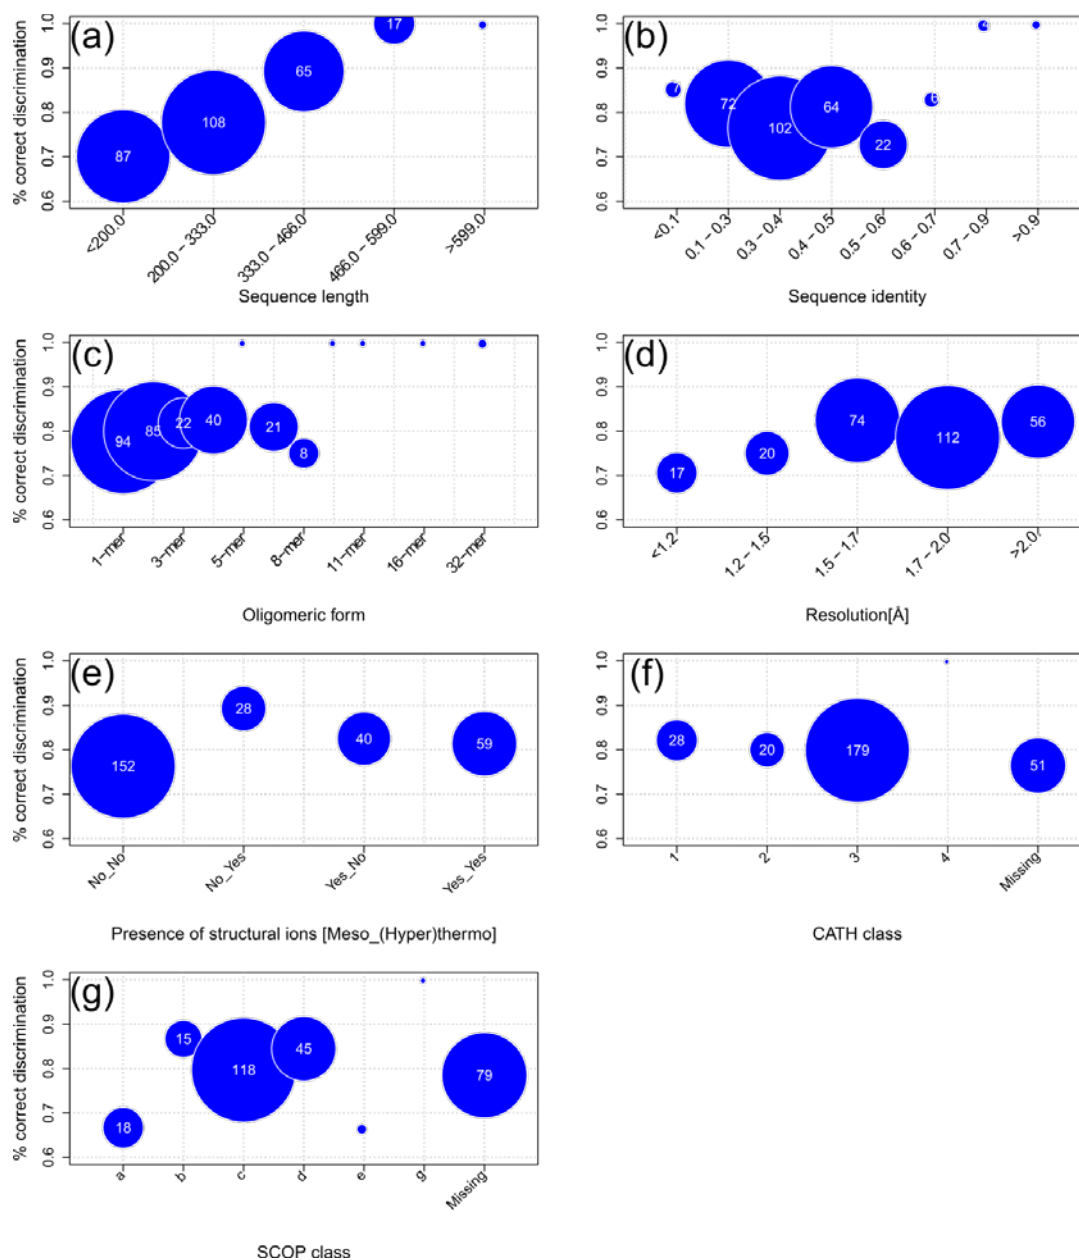

**Figure S1.** Discrimination accuracy between mesophilic and (hyper)thermophilic protomers, based on clusters of residues with good hydrophobic interaction energies, grouped according to the sequence length (a), sequence identity (b), oligomeric form (c), resolution of the X-ray structure (d), presence of structural ions in the structure (e), CATH class (f), and SCOP class (g). Mesophilic/(hyper)thermophilic pairs were grouped according to the property of the mesophilic protein chain in the structure unless indicated otherwise in the abscissa label of the plot. The size of a circle represents the number of pairs in each group (also indicated by the number in the circle), and the circle's position on the ordinate indicates the percentage of correct discrimination for these pairs.



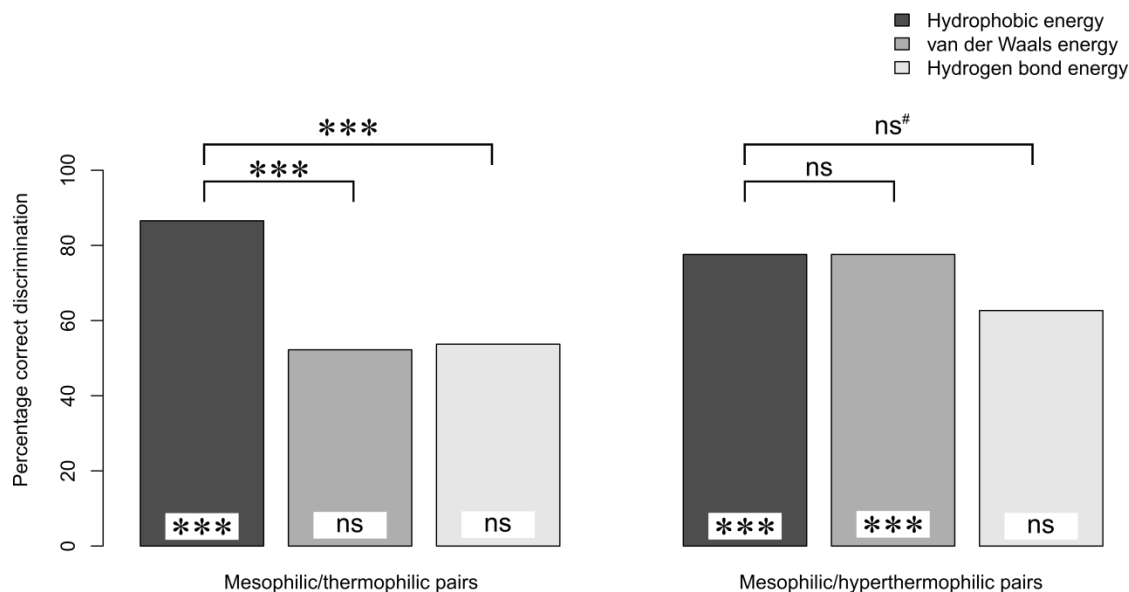

**Figure S2.** Discrimination accuracy between mesophilic and (hyper)thermophilic protein bio-assemblies based on clusters of residues with good residue-wise energy components. Lines connecting two bars indicate if the difference in discrimination accuracies for the two respective energy components is statistically significant. Marks at the bottom of a column indicate if the discrimination accuracy is significantly different from a random discrimination (50%). The statistical significance of the differences in discrimination accuracies is computed by a bootstrap hypothesis test of equality generating 10000 bootstrap samples; the significance levels are marked by \*\*\*:  $p < 0.001$ ; \*\*:  $p < 0.01$ ; ns:  $p > 0.05$ . The  $p$ -value between hydrophobic and hydrogen bond energies in the case of mesophilic/hyperthermophilic pairs is 0.0534 (see ns<sup>#</sup> in the figure).

## Supplemental references

1. Berman, H. M.; Westbrook, J.; Feng, Z.; Gilliland, G.; Bhat, T. N.; Weissig, H.; Shindyalov, I. N.; Bourne, P. E. The protein data bank. *Nucleic Acids Res.* **2000**, *28*, 235-242.
2. Sastry, G. M.; Adzhigirey, M.; Day, T.; Annabhimoju, R.; Sherman, W. Protein and ligand preparation: parameters, protocols, and influence on virtual screening enrichments. *J. Comput. Aided Mol. Des.* **2013**, *27*, 221-234.
3. Jacobson, M. P.; Friesner, R. A.; Xiang, Z.; Honig, B. On the role of the crystal environment in determining protein side-chain conformations. *J. Mol. Biol.* **2002**, *320*, 597-608.
4. Jacobson, M. P.; Pincus, D. L.; Rapp, C. S.; Day, T. J.; Honig, B.; Shaw, D. E.; Friesner, R. A. A hierarchical approach to all-atom protein loop prediction. *Proteins: Struct., Funct., Bioinf.* **2004**, *55*, 351-367.
5. Dahiyat, B. I.; Gordon, D. B.; Mayo, S. L. Automated design of the surface positions of protein helices. *Protein Sci.* **1997**, *6*, 1333-1337.
6. *FIRST, a program for analysing flexibility of networks*, <http://flexweb.asu.edu/> (accessed January 17, 2014).
7. Bae, E.; Bannen, R. M.; Phillips, G. N., Jr. Bioinformatic method for protein thermal stabilization by structural entropy optimization. *Proc. Natl. Acad. Sci. USA* **2008**, *105*, 9594-9597.
8. Chun, S. Y.; Strobel, S.; Bassford, P., Jr.; Randall, L. L. Folding of maltose-binding protein. Evidence for the identity of the rate-determining step in vivo and in vitro. *J. Biol. Chem.* **1993**, *268*, 20855-20862.
9. Diamond, D. L.; Strobel, S.; Chun, S. Y.; Randall, L. L. Interaction of SecB with intermediates along the folding pathway of maltose-binding protein. *Protein Sci.* **1995**, *4*, 1118-1123.
10. Prajapati, R. S.; Lingaraju, G. M.; Bacchawat, K.; Surolia, A.; Varadarajan, R. Thermodynamic effects of replacements of Pro residues in helix interiors of maltose-binding protein. *Proteins* **2003**, *53*, 863-871.
11. Chang, Y.; Park, C. Mapping transient partial unfolding by protein engineering and native-state proteolysis. *J. Mol. Biol.* **2009**, *393*, 543-556.
